# Supplementary material
Source: PubMed Central journal article supplement (PMC9509472)
Supplement: NIHMS1826986-supplement-2.pdf [file NIHMS1826986-supplement-2.pdf]

# Supplemental Figures

## Figure S1

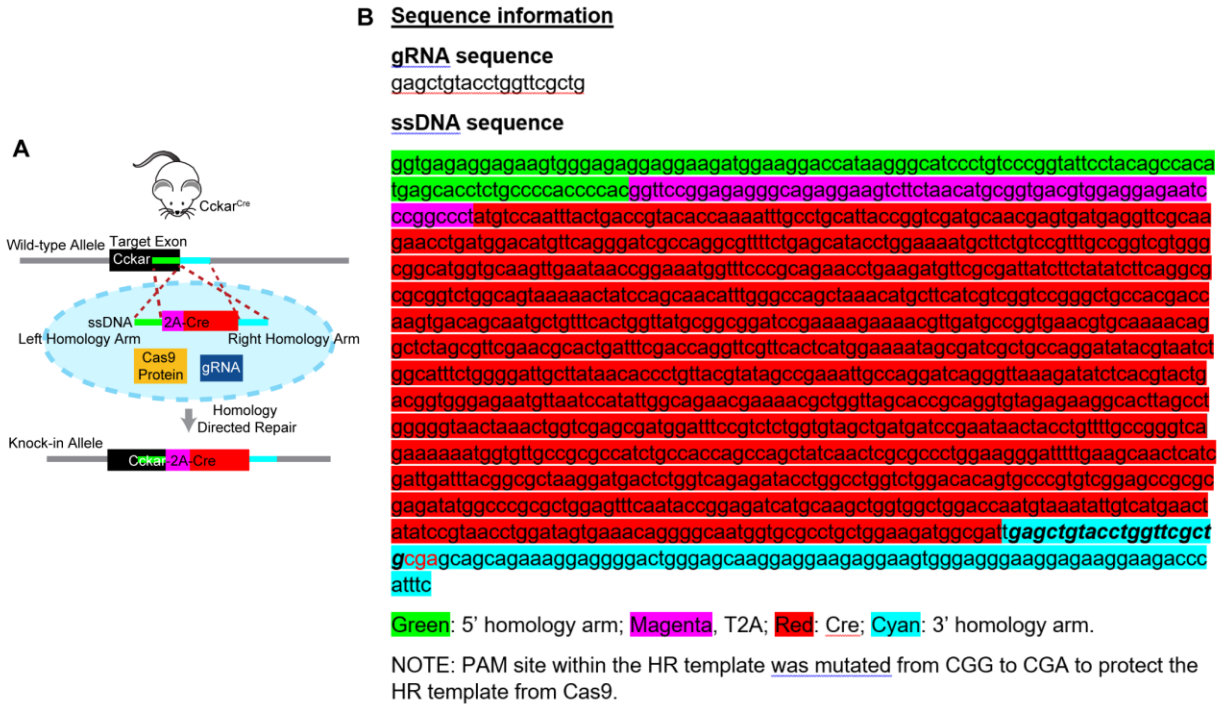

### Figure S1. Generation of *Cckar*<sup>Cre</sup> mice. Related to Figure 1

(A) Strategy for inserting 2A-Cre into the *Cckar* locus using CRISPR/Cas9-mediated homologous recombination (HR).

(B) Sequence information of gRNA and single-stranded DNA (ssDNA).

**Figure S2**

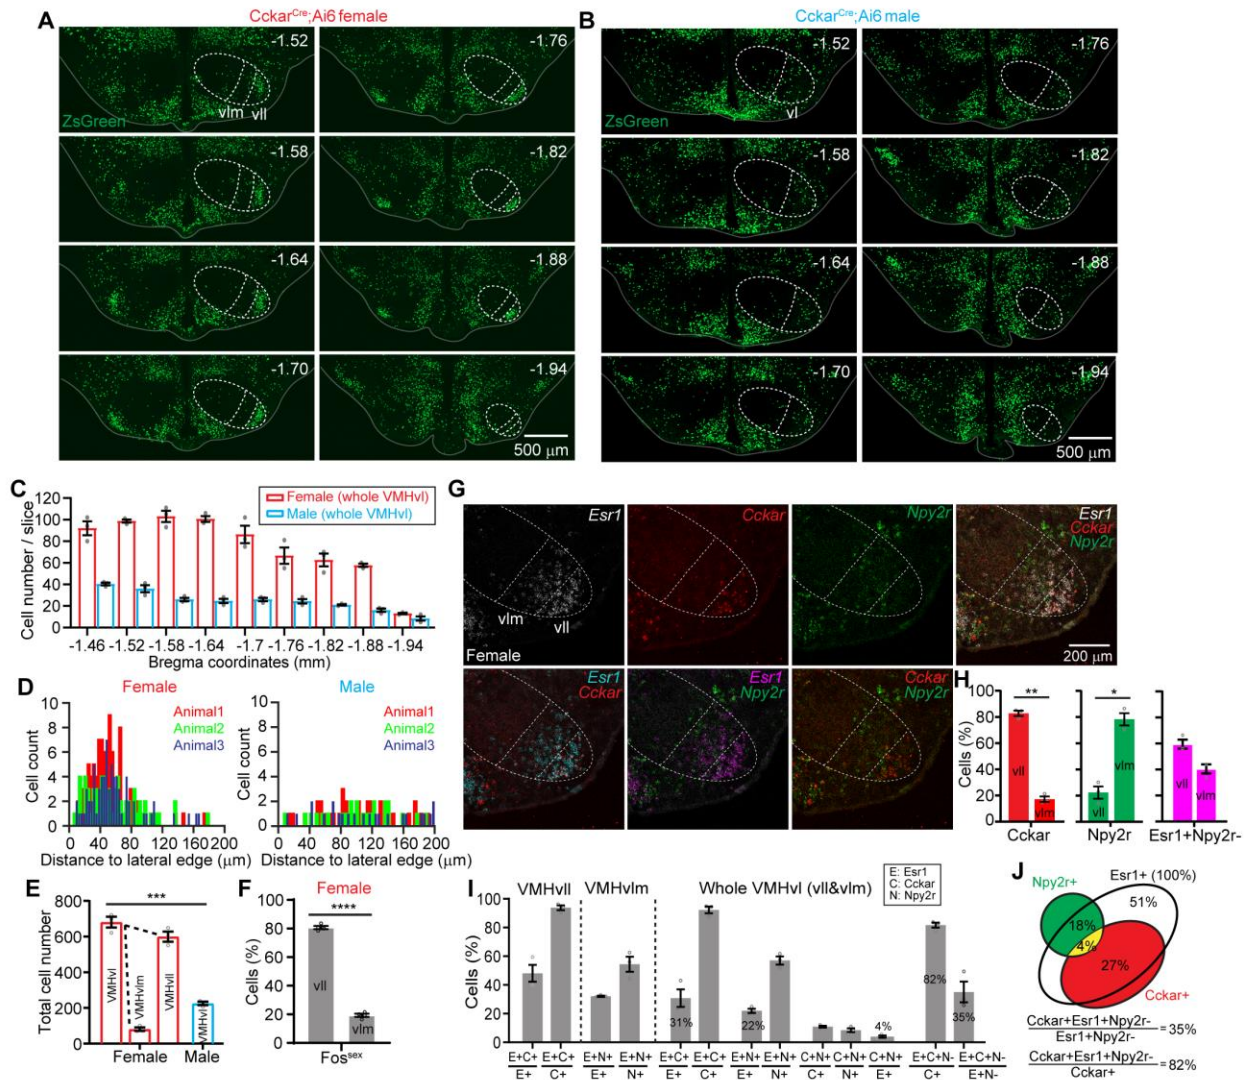

**Figure S2. Sexually dimorphic expression of *Cckar* in the VMHvl and the relationship of *Cckar*, *Esr1* and *Npy2r* in female VMHvl. Related to Figure 1**

(A) The distribution of ZsGreen cells at different Bregma levels along the anterior-posterior axis of the VMH from a *Cckar<sup>Cre</sup>;Ai6* female mouse. Dotted lines indicate VMH subdivisions.

(B) The distribution of ZsGreen cells in the VMH of a male *Cckar<sup>Cre</sup>;Ai6* mouse.

(C) Quantification of (B) and (C) in the whole VMHvl from Bregma -1.46 mm to -1.94 mm.

(D) Distribution of the distance of *Cckar* cells to the lateral edge of VMH from three females (left) and three males (right).

(E) The total numbers of Cckar+ cells in female VMHvl, VMHvlm and VMHvll, and male VMHvl.

(F) The distribution of Fos<sup>Sex</sup> cells in the female VMHvll and VMHvlm.

(G) Representative images showing expression of *Esr1*, *Cckar*, and *Npy2r* mRNA. Cckar (red), Npy2r (green), Esr1 color is changed when overlaid with different genes for better visualization.

(H) Proportions of Cckar (red), Npy2r (green) and Esr1+Npy2r- (magenta) cells in the lateral- (vll) vs. medial- (vlm) subdivisions of VMHvl.

(I) The overlap between different populations of cells. The numbers used in (J) are highlighted inside of the bars.

(J) (Top) The overlap between Npy2r+&Cckar+, Npy2r+&Esr1+, Cckar+&Esr1+ among the whole VMHvl Esr1+ cells. (Bottom) the overlap between Cckar+& Esr1+Npy2r- cells.

Data are mean  $\pm$  s.e.m. (E) Two-tailed unpaired t test. (F, H) Two-tailed paired t test. \* $p < 0.05$ ; \*\* $p < 0.01$ ; \*\*\* $p < 0.001$ ; \*\*\*\* $p < 0.0001$ .

n = number of animals. n=3 (C, E, H, I), n=4 (F) females.

**Figure S3**

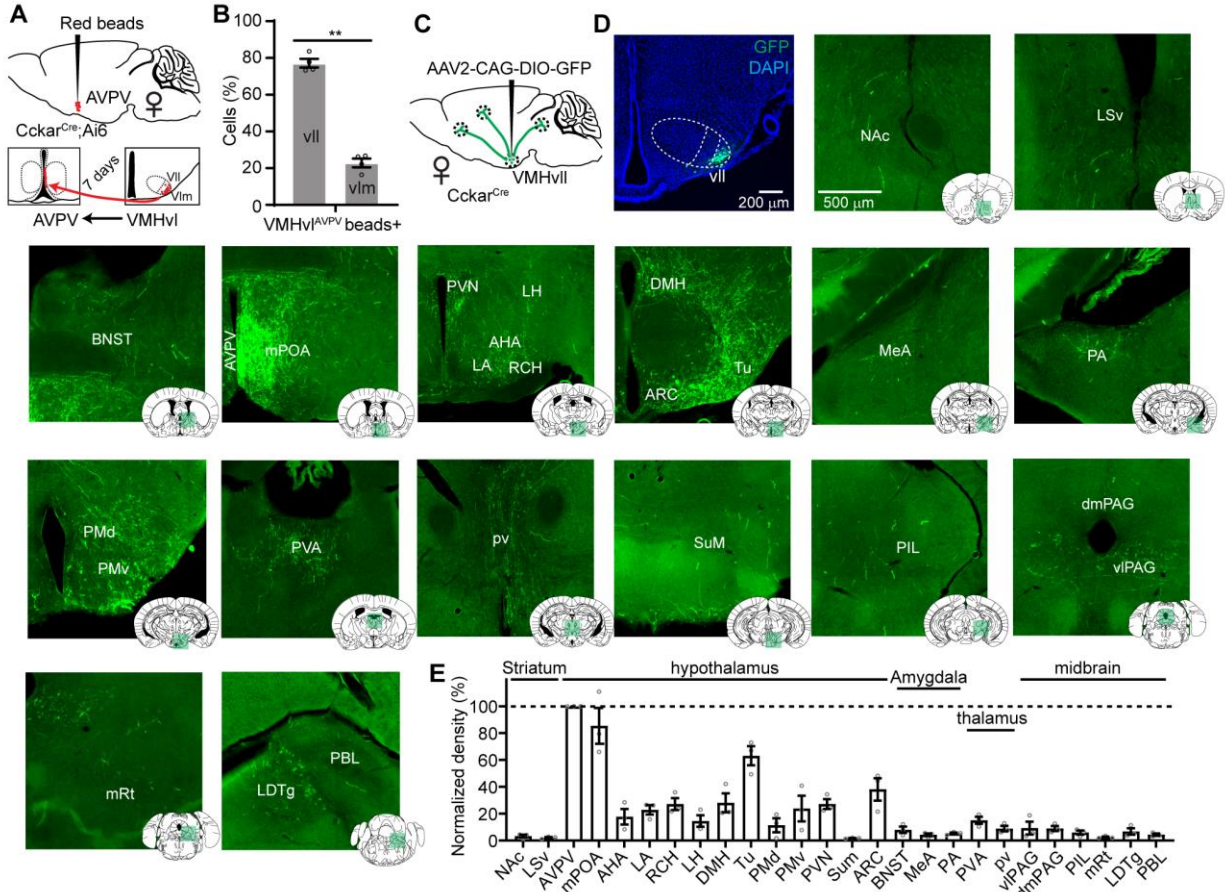

**Figure S3. The projection pattern of female VMHvII<sup>Cckar</sup> cells. Related to Figure 1**

- (A) Injection of red retrobeads into AVPV to retrogradely label VMHvI cells.
- (B) The distribution of beads+ cells in female VMHvII and VMHvIm 7 days after injection.
- (C) Viral strategy for axon tracing of female VMHvII<sup>Cckar</sup> cells.
- (D) Representative images showing GFP expressing VMHvII<sup>Cckar</sup> cells and their axon terminals in various brain regions of a female mouse.
- (E) Quantification of GFP+ fiber density in various brain regions.

Nac, nucleus accumbens; LSv, lateral septum ventral part; BNST, bed nucleus of stria terminalis; AVPV, anteroventral periventricular nucleus; mPOA, medial preoptic area; PVN, paraventricular nucleus of the hypothalamus; LH, lateral hypothalamus; AHA, anterior hypothalamic area; LA, lateroanterior hypothalamic nucleus; RCH, retrochiasmatic area; DMH, dorsomedial hypothalamic nucleus; ARC, arcuate hypothalamic nucleus; Tu, tuberal nucleus; MeA, medial amygdala; PA, posterior amygdala; PMd, dorsal preammillary nucleus; PMv, ventral preammillary nucleus; PVA, paraventricular thalamic nucleus, anterior part; pv, periventricular fiber system;

SuM, supramammillary nucleus; PIL, posterior intralaminar thalamic nucleus; dmPAG, dorsomedial periaqueductal gray; vlPAG, ventrolateral periaqueductal gray; mRt, mesencephalic reticular formation; LDTg, laterodorsal tegmental nucleus; PBL, lateral parabrachial nucleus;

Data are mean  $\pm$  s.e.m. (B) Two-tailed paired t test. \*\* $p < 0.01$ .

n = number of animals. n=4 (B), n=3 (E) females.

**Figure S4**

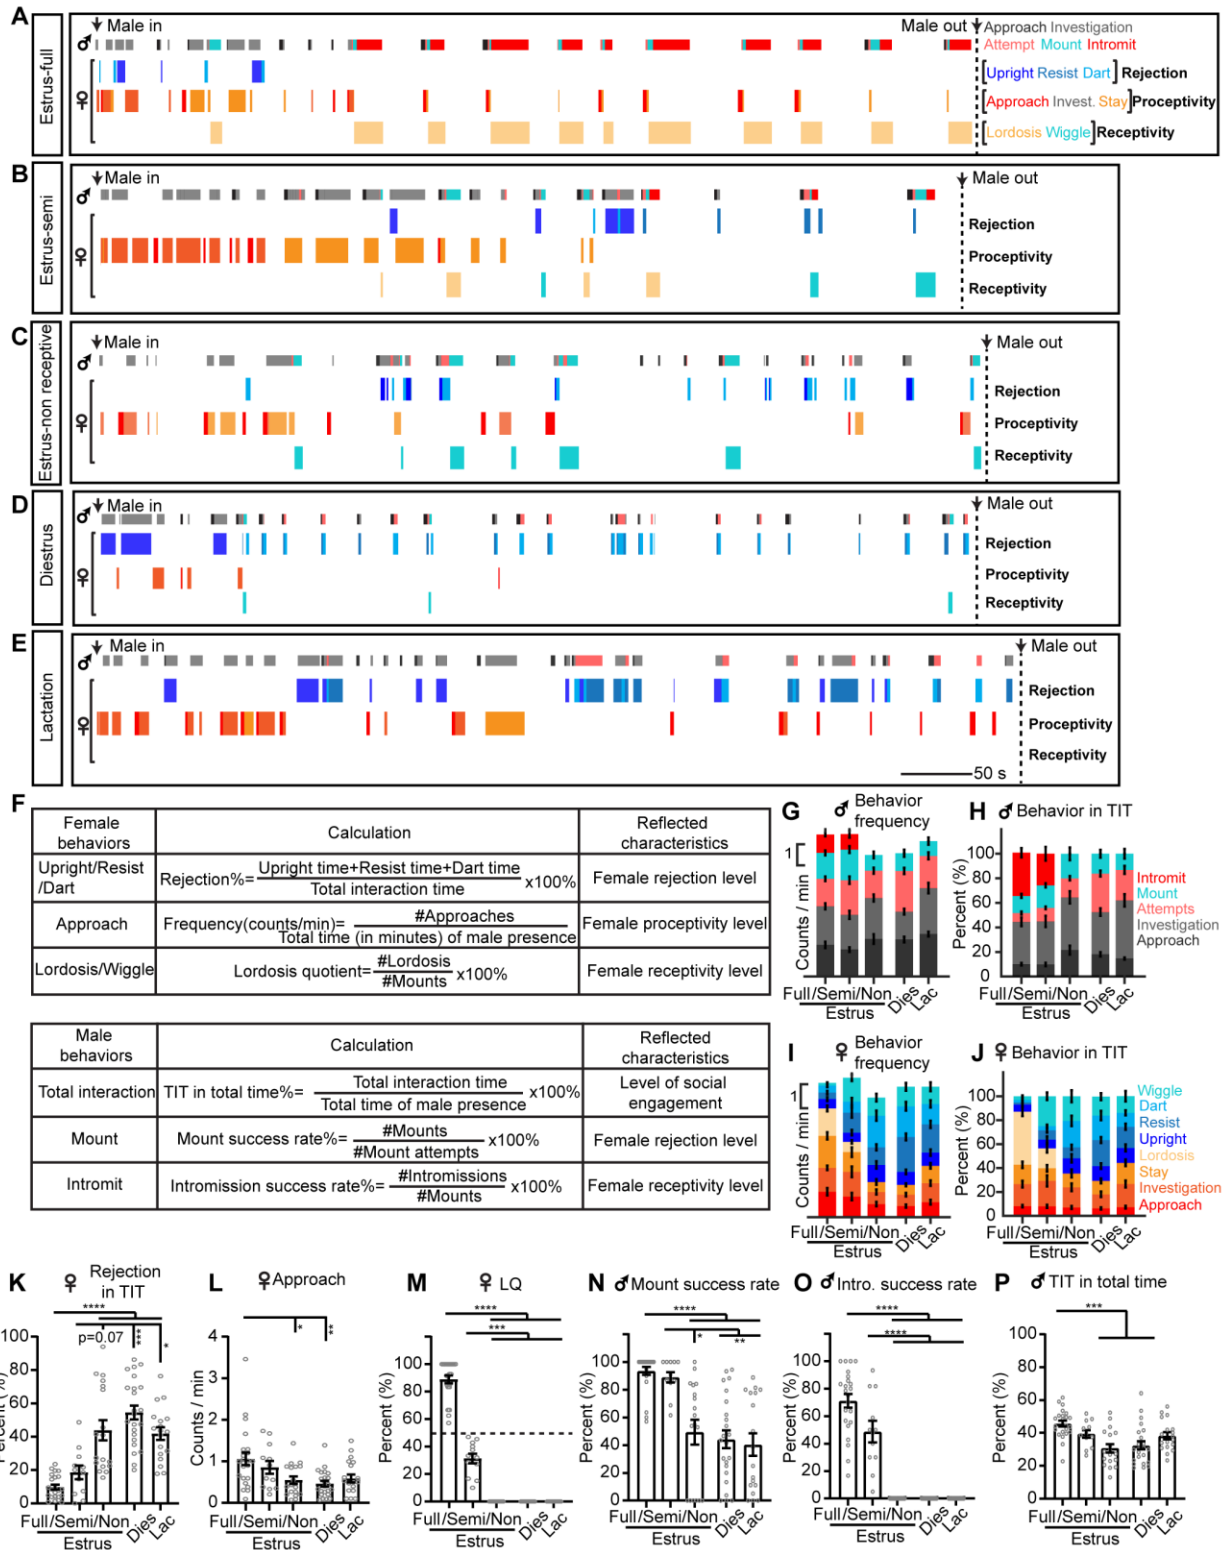

**Figure S4. Characterization of sexual behaviors of female mice at various reproductive states. Related to Figures 2 and 4**

(A-E) Raster plots showing social behaviors of a pair of male and female mice during ~10 min free interaction. The females were in estrus (A-C), diestrus (D) or lactation (E) and showed varying levels of rejection, proceptivity and receptivity. All males were highly sexually experienced. Behaviors are color coded.

(F) A table showing a list of analyzed female and male behaviors, the parameters used for quantification and the reflected characteristics of the females.

(G and I) The frequency of various behaviors expressed by males (G) and females (I) during male-female interaction, separated based on females' reproductive and receptive states.

(H and J) The percentage of time the male (H) and the female (J) expressing a specific behavior during the total interaction time (TIT), separated based on females' reproductive and receptive states.

(K) The percentage of time female spent on rejecting the male during the total interaction time for each of five groups of females.

(L) The frequency to female-initiated approach for each of the five groups.

(M) The LQ of each of the five groups of females.

(N) The mounting success rate of the male when paired with females from different groups.

(O) The intromission success rate of the male when paired with females from different groups.

(P) The percentage of time animals spent on interacting with each other during a recording session.

Data are mean  $\pm$  s.e.m. (K-P) Kruskal-Wallis test with Dunn's multiple comparisons test. \* $p < 0.05$ ; \*\* $p < 0.01$ ; \*\*\* $p < 0.001$ ; \*\*\*\* $p < 0.0001$ .

n = number of animals. (I-M, P) n=23, 12, 18, 23, 18 fully receptive estrous, semi-receptive estrous, non-receptive estrous, diestrus and lactating females, respectively. Numbers of males in (G-H, N-P) are the same as numbers of females in (I-M, P) for each group.

**Figure S5**

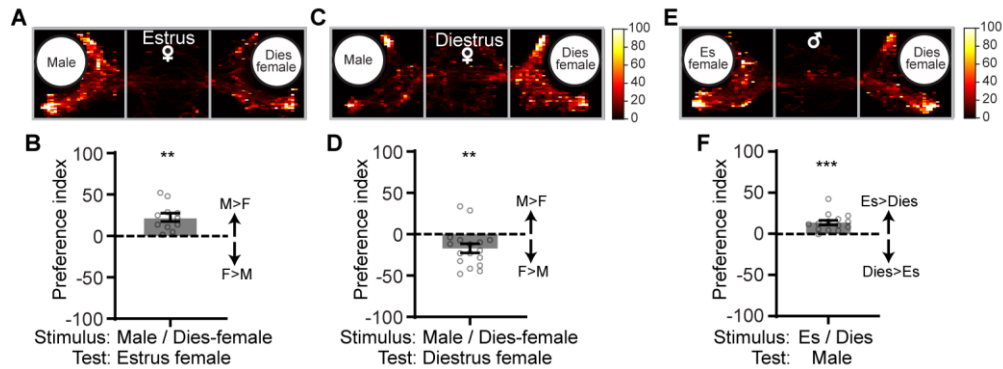

**Figure S5. Social preference of male and female mice. Related to Figures 2 and 4**

(A and C) Heatmap showing the distribution of female's body center location in a social preference test when the female is in estrus (A) or diestrus (C). Stimulus animals are a sexually experienced unfamiliar male and an unfamiliar diestrus female.

(B and D) Preference index in the social test of estrous (B) and diestrus females (D).  $PI = (\text{time in male chamber} - \text{time in female chamber}) / (\text{time in male chamber} + \text{time in female chamber}) \times 100\%$ .

(E) Heatmap showing the distribution of a male's body center location in a social preference test. Stimulus animals are an unfamiliar diestrus female and an unfamiliar estrous female.

(F) Preference index in the social test of sexually experienced males.  $PI = (\text{time in estrous female chamber} - \text{time in diestrus female chamber}) / (\text{time in estrous female chamber} + \text{time in diestrus female chamber}) \times 100\%$ .

Data are mean  $\pm$  s.e.m. (B-F) One sample t test, with hypothetical value as 0. \*\* $p < 0.01$ ; \*\*\* $p < 0.001$ .

n = number of animals. n = 11 (B), 17 (D) and 14 (F) animals.



**Figure S6**

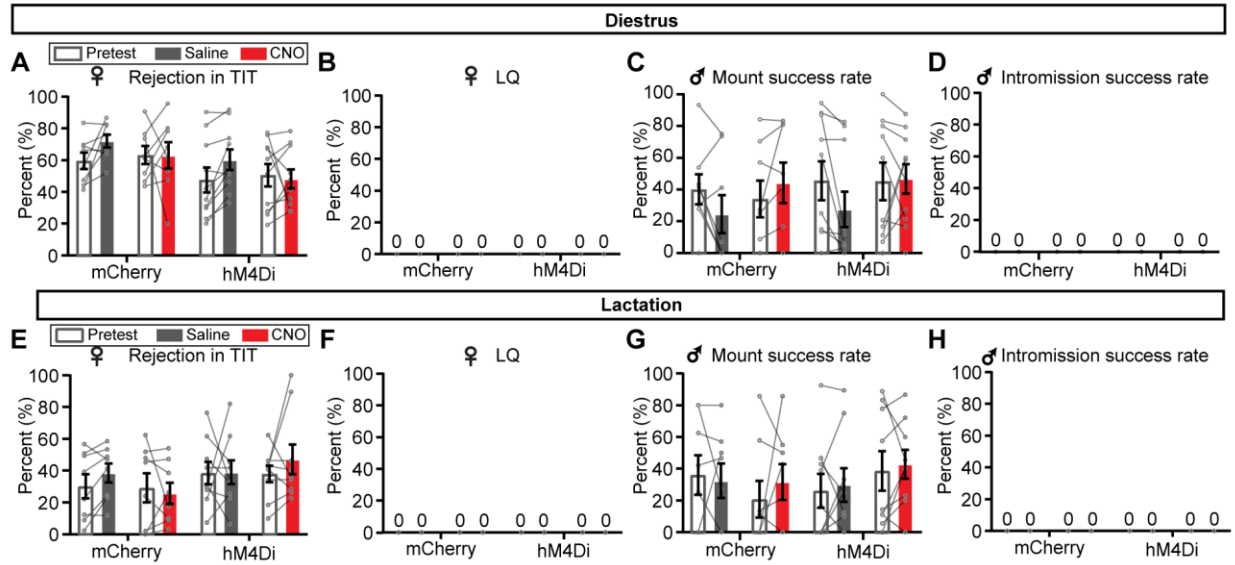

**Figure S6. Inhibiting VMHvl<sup>Cckar</sup> cells does not change sexual behaviors in diestrous and lactating females. Related to Figure 2**

(A-D) In diestrous female, inhibiting VMHvl<sup>Cckar</sup> cells does not change the percentage of total interaction time females spent on rejecting the males (summation of upright, resist and dart) (A), lordosis quotient (B), male mount success rate (C), and male intromission success rate (D).

(E-H) same as (A-D) but in lactating females.

Data are mean ± s.e.m. (A, C, E, G) Two-way ANOVA with Sidak's multiple comparisons test.

n = number of animals. n=8 for mCherry group, and n=10 (A-D), 9 (E-H) for hM4Di group.

**Figure S7**

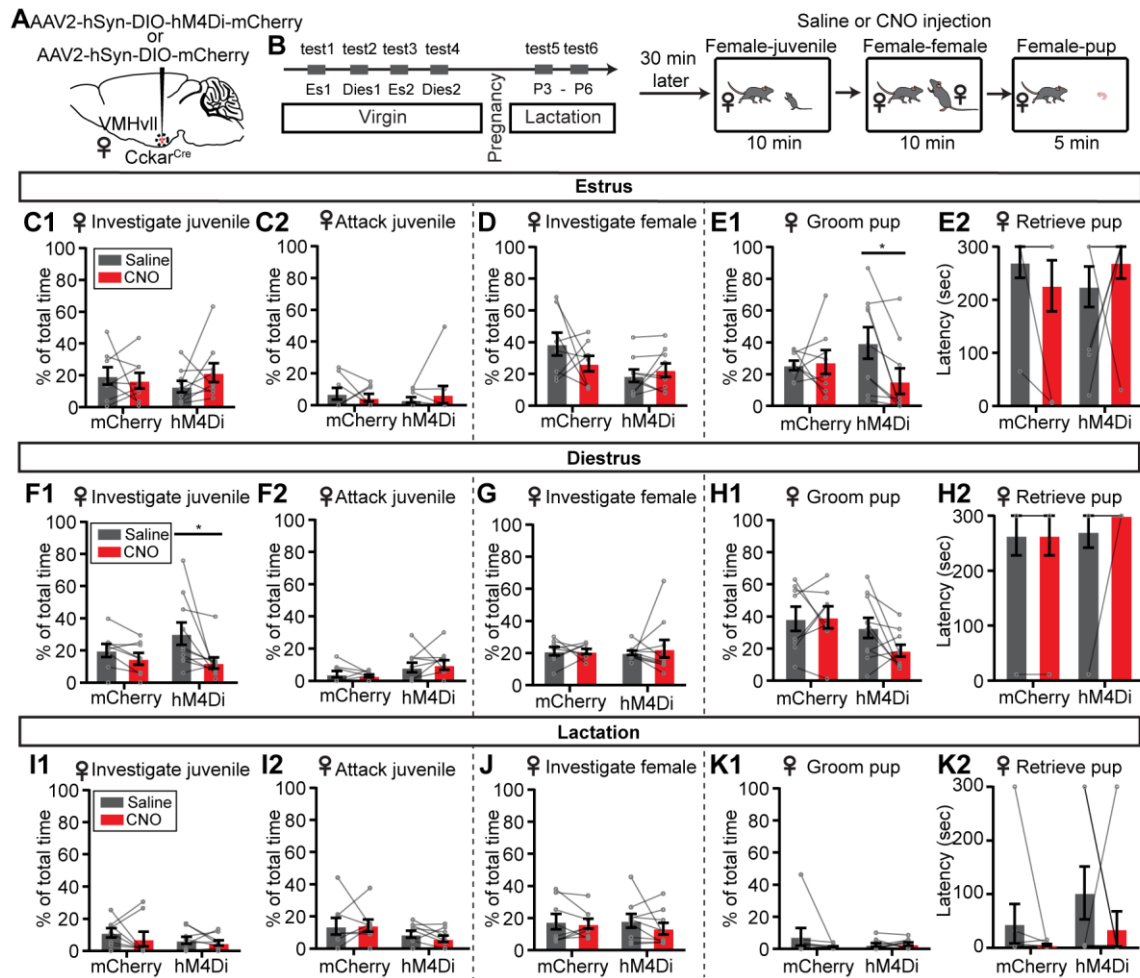

**Figure S7. Inactivation of VMHvII<sup>Cckar</sup> cells causes minimal change in social behaviors towards juveniles, females and pups. Related to Figure 2**

(A) Viral strategy for chemogenetic inhibition of female VMHvII<sup>Cckar</sup> cells.

(B) Timeline of the behavioral test.

(C-E) In estrous female, inhibiting VMHvII<sup>Cckar</sup> cells did not change the percentage of time female spent on investigating juveniles (C1), attacking juveniles (C2), and investigating females (D).

(E) VMHvII<sup>Cckar</sup> cell inhibition slightly decreased the percentage of time female spent on grooming pups (E1) but did not change the latency of pup retrieval (E2).

(F-H) In diestrous females, inhibiting VMHvII<sup>Cckar</sup> cells decreased the percentage time animal spent on investigating juveniles (F1), but did not change any other behaviors towards the females, juveniles and pups.

(I-K) In lactating females, inhibiting VMHvII<sup>Cckar</sup> cells did not change any behaviors towards juveniles, females and pups.

Data are mean  $\pm$  s.e.m. (C1-K2) Two-way ANOVA with Sidak's multiple comparisons test. \* $p < 0.05$ .

n = number of animals. n=8 for mCherry group, and n=9 (C-E), 10 (F-H), 9 (I-K) for hM4Di group.

**Figure S8**

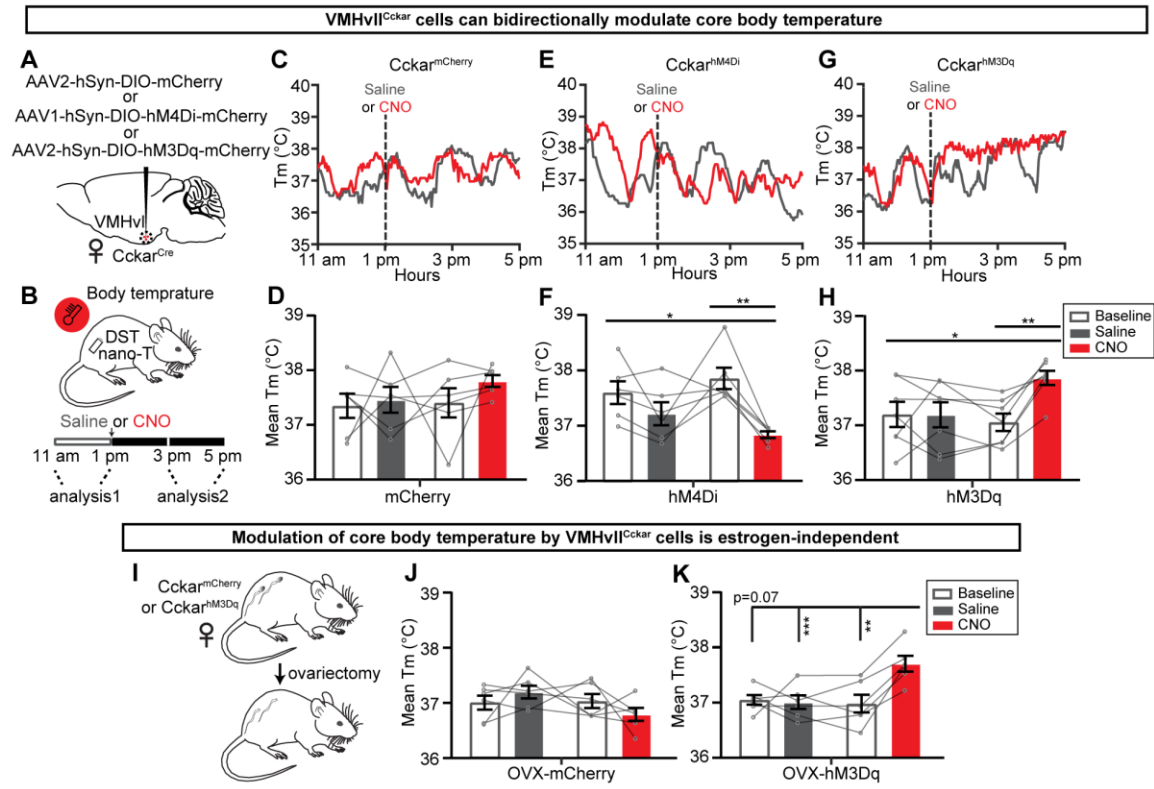

**Figure S8. VMHvl<sup>Cckar</sup> cells show estrogen-independent bi-directional modulation of core body temperature. Related to Figures 2 and 4**

(A) Viral strategy to chemogenetically inhibit or activate VMHvl<sup>Cckar</sup> cells.

(B) Illustration of chronic body temperature monitoring and the timing of saline or CNO injection. Nano-T logger is implanted in the abdominal cavity and attached to the inside of the body wall.

(C, E, G) Core body temperature from representative Cckar<sup>mCherry</sup> (C), Cckar<sup>hM4Di</sup> (E), Cckar<sup>hM3Dq</sup> (G) female mice, between 11 am to 5 pm, before and after saline or CNO injection at 1 pm.

(D, F, H) Quantification of the mean core body temperature in Cckar<sup>mCherry</sup> (D), Cckar<sup>hM4Di</sup> (F), Cckar<sup>hM3Dq</sup> (H) female mice. Two hours (11 am-1 pm) in baseline and two hours (3 pm to 5 pm) post-saline or CNO injection were used for calculation.

(I) Ovariectomy on Cckar<sup>mCherry</sup> and Cckar<sup>hM3Dq</sup> females.

(J-K) Quantification of the mean core body temperature in OVX-Cckar<sup>mCherry</sup> (J) and OVX- Cckar<sup>hM3Dq</sup> females (K). Two hours (11 am-1 pm) in baseline and two hours (3 pm to 5 pm) after saline or CNO injection were used for data analysis.

Data are mean ± s.e.m. (D, F, H, J and K) RM one-way ANOVA with Tukey's multiple comparisons test. \*p < 0.05; \*\*p < 0.01; \*\*\*p < 0.001.

n = number of animals. n=6 (D, F, J, K) and 7 (H) females.

**Figure S9**

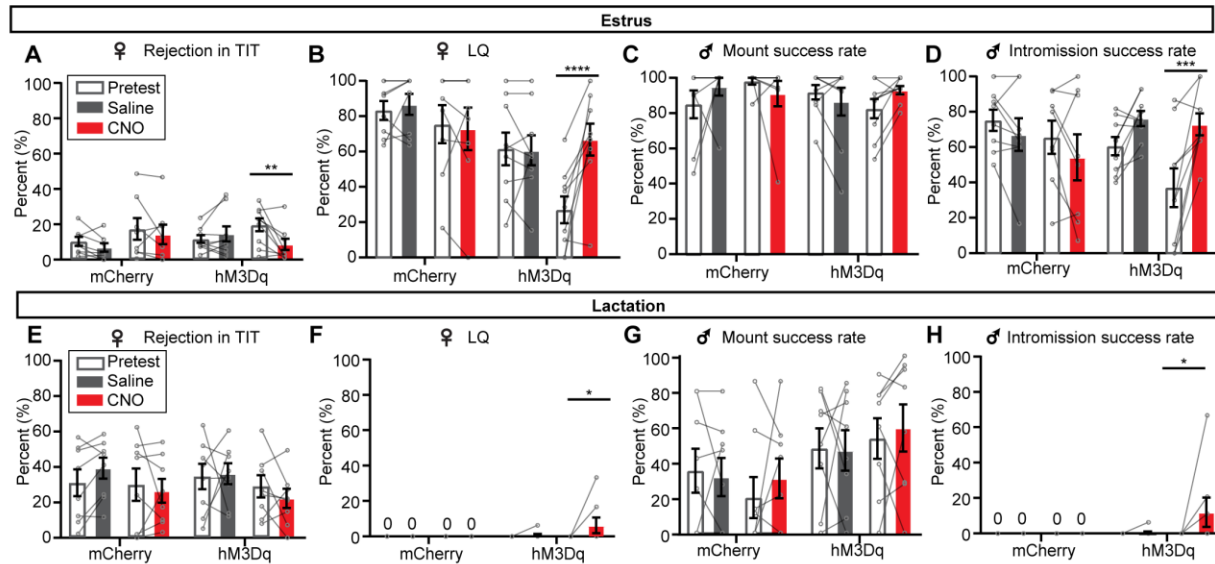

**Figure S9. Chemogenetic activation of VMHvl<sup>Cckar</sup> cells promotes sexual behaviors effectively in estrous females, but only minimally in lactating females. Related to Figure 4**

(A-D) In estrous female, activating VMHvl<sup>Cckar</sup> decreased the percentage of total interaction time females spent on rejecting the males (A), increased lordosis quotient (B), did not change male mount success rate (C), and increased male intromission success rate (D).

(E-H) same as (A-D) but in lactating females.

Data are mean  $\pm$  s.e.m. (A-H) Two-way ANOVA with Sidak's multiple comparisons test. \* $p < 0.05$ ; \*\* $p < 0.01$ ; \*\*\* $p < 0.001$ ; \*\*\*\* $p < 0.0001$ .

n = number of animals. mCherry: n=8 (A-D) and 8 (E-H); hM3Dq: n=9 (A-D) and 8 (E-H) females.

**Figure S10**

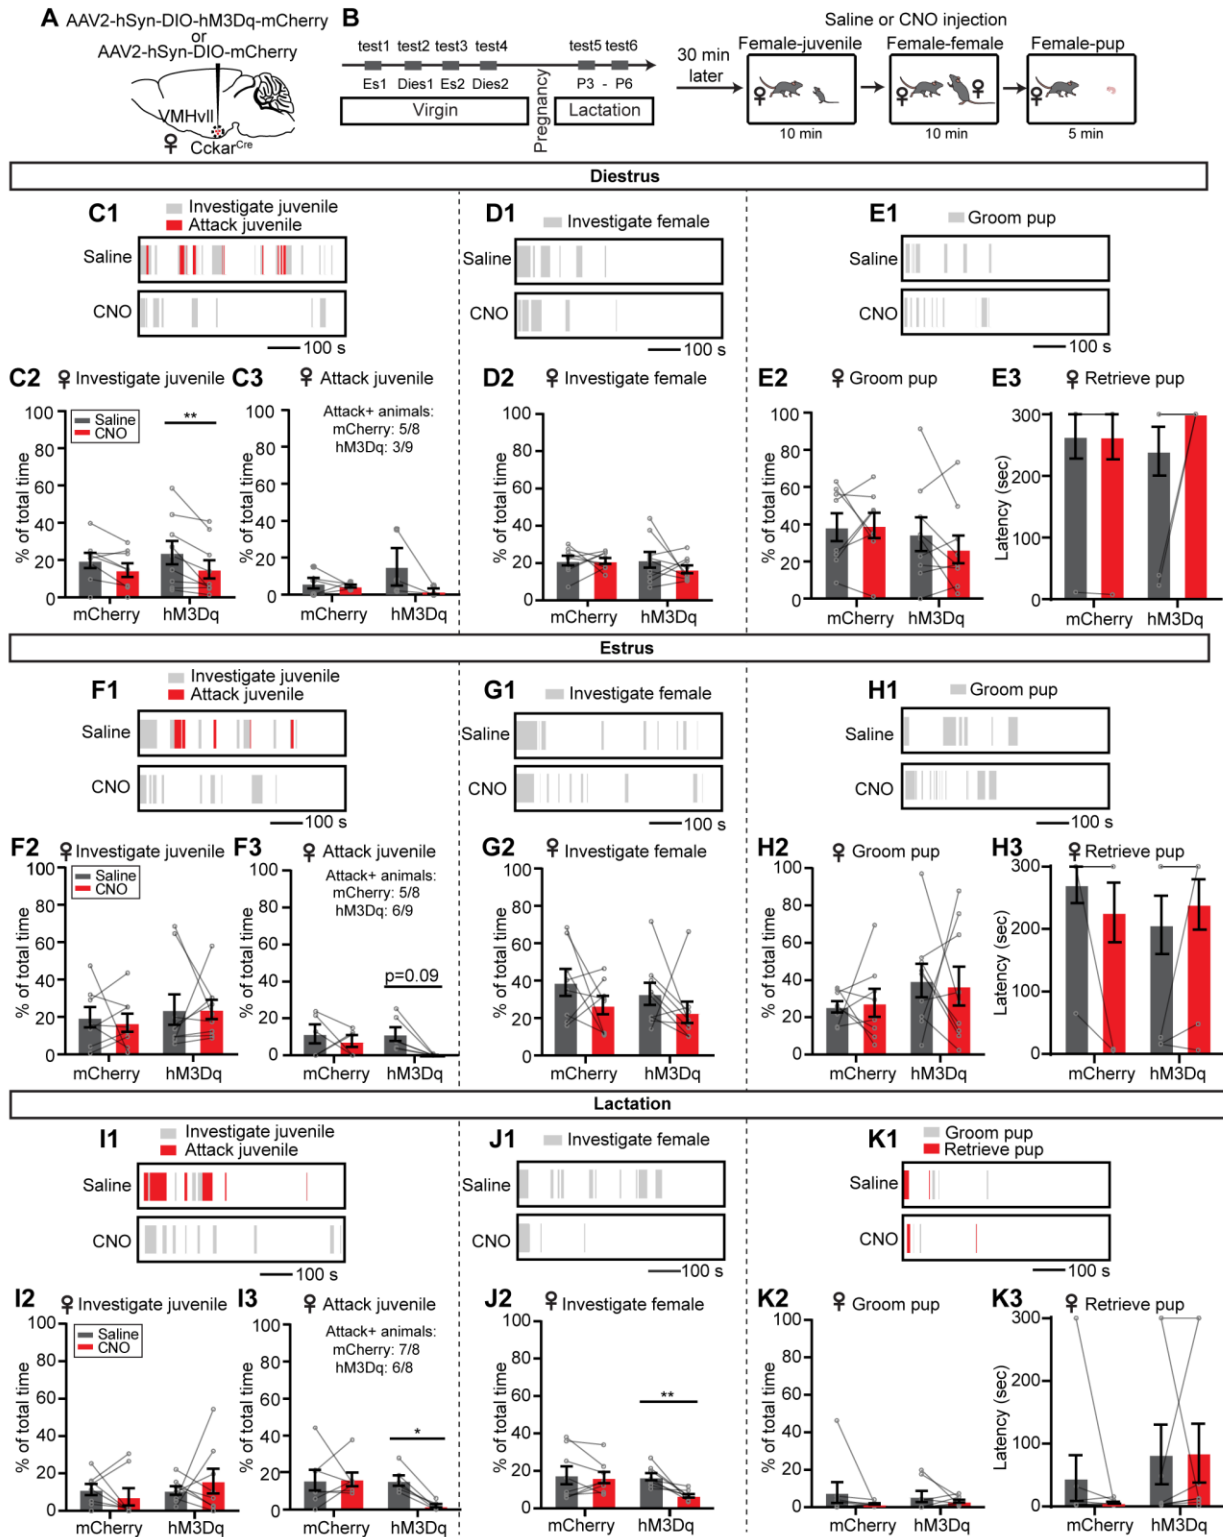

**Figure S10. Chemogenetic activation of VMHvII<sup>Cckar</sup> cells suppresses female aggression. Related to Figure 4**

(A) Viral strategy for chemogenetic inhibition of female VMHvII<sup>Cckar</sup> cells.

(B) Timeline of the behavioral test.

(C1) Raster plots showing the behaviors of a diestrous Cckar<sup>hM3Dq</sup> female towards a male juvenile intruder after saline or CNO i. p. injection.

(C2 and C3) After CNO injection, diestrous Cckar<sup>hM3Dq</sup> females spent less percentage of time investigating juveniles (C2). Time spent on attacking juvenile also showed a trend of decrease (C3).

(D) Representative raster plots (D1) and bar plots (D2) showing diestrous Cckar<sup>hM3Dq</sup> females do not change investigation time towards an adult female intruder after VMHvII<sup>Cckar</sup> cell activation.

(E) Representative raster plots (E1) and bar plots (E2 and E3) showing diestrous Cckar<sup>hM3Dq</sup> females do not change the percentage of time spent on grooming pups (E2) and the latency of pup retrieval (E3) after VMHvII<sup>Cckar</sup> cell activation.

(F-H) follow the conventions as in (C-E) showing results in estrous females. Activation of VMHvII<sup>Cckar</sup> cells in estrous females suppressed female aggression towards juveniles without affecting adult female- and pup-directed behaviors.

(I-K) follow the conventions as in (C-E) showing results in lactating females. Activation of VMHvII<sup>Cckar</sup> cells in lactating females suppressed female aggression towards juveniles and adult female-directed investigation without affecting pup-directed behaviors.

Data are mean  $\pm$  s.e.m. (C-K) Two way ANOVA followed by Sidak's multiple comparisons test. \* $p < 0.05$ ; \*\* $p < 0.01$ .

n = number of animals. mCherry: n=8 for females in each reproductive state. hM3Dq: n=9, 9, 8 females in diestrus, estrus and lactation, respectively. For juvenile-attacking experiment, only females showed natural aggression were included for analysis. mCherry: n=5, 5, 7 (C3, F3, I3), and hM3Dq: n=3, 6, 6 (C3, F3, I3).

**Figure S11**

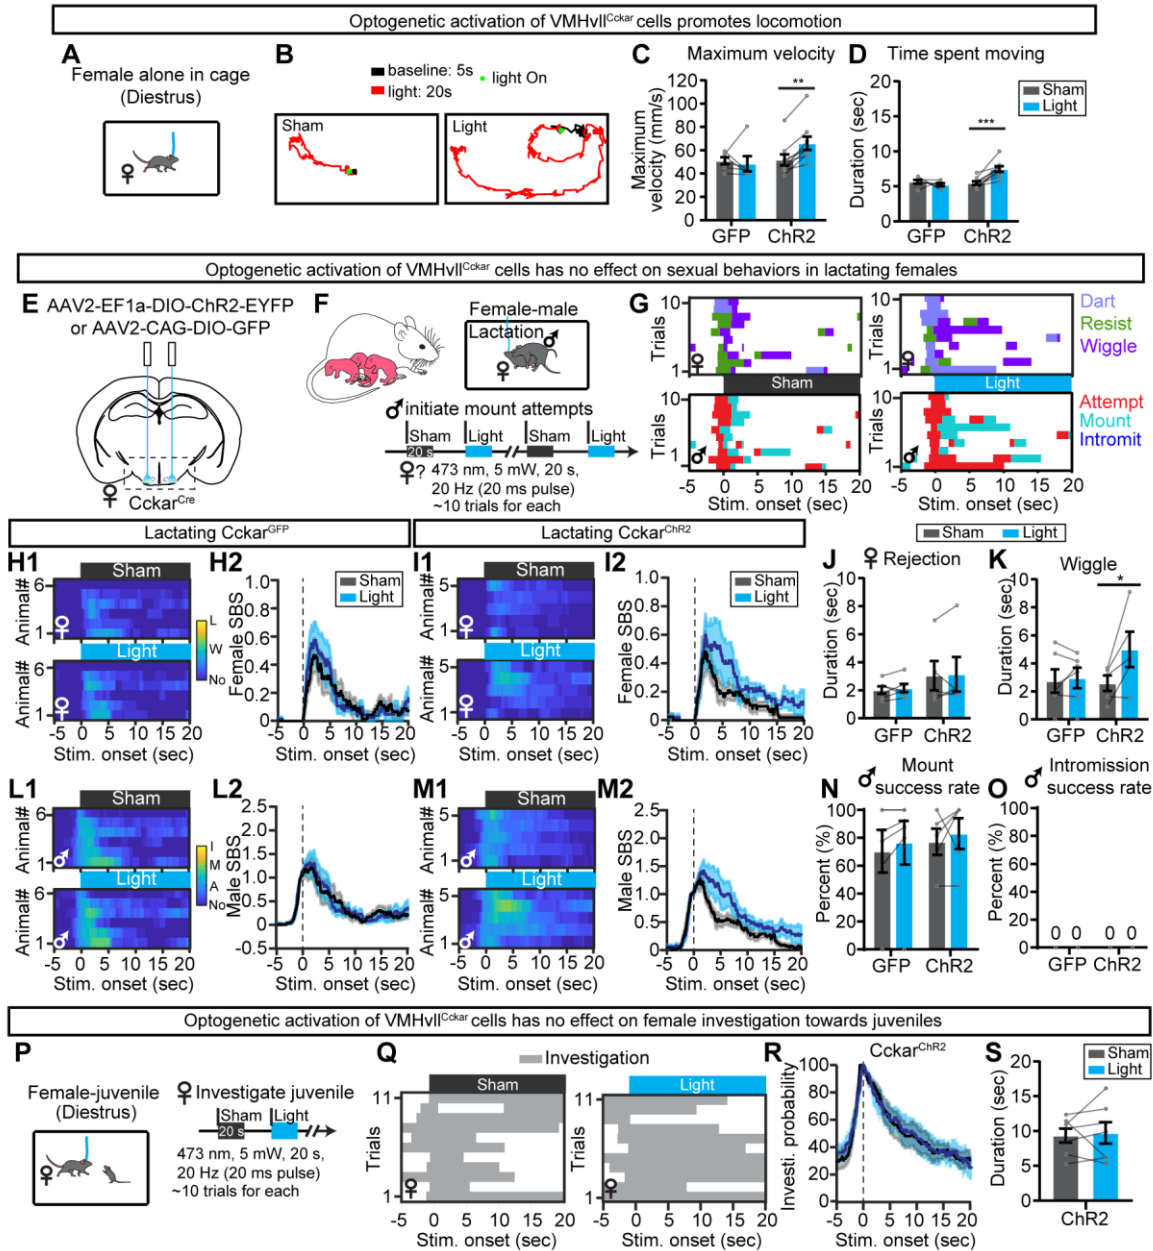

**Figure S11. Additional behaviors by optogenetic activation of VMHvl<sup>Cckar</sup> cells under different reproductive states. Related to Figure 5**

(A) Female was alone in its homecage during light stimulation.

(B) Representative movement trajectories before (5 s, black) and during (20 s, red) sham and light stimulation when a Cckar<sup>ChR2</sup> female was alone in the home cage. Green dot: sham or light onset.

(C-D) Maximum velocity (C) and time in moving (D) during sham and light stimulation periods in Cckar<sup>GFP</sup> and Cckar<sup>ChR2</sup> groups.



- (E) Viral strategy to optogenetically activate female VMHvl<sup>Cckar</sup> cells.
- (F) Behavioral paradigm and stimulation protocol. Light/Sham stimulation started when male attempted to mount the lactating test female.
- (G) Raster plots showing female (top) and male (bottom) behaviors between a lactating Cckar<sup>ChR2</sup> female and a sexually experienced male during sham and light stimulation delivered to the female.
- (H) Heatmaps (H1) and PSTHs (H2) showing female SBS aligned to sham or light onset of all lactating Cckar<sup>GFP</sup> females. L: lordosis; W: wiggle; No: no mating.
- (I) Heatmaps (I1) and PSTHs (I2) showing female SBS aligned to sham or light onset of all lactating Cckar<sup>ChR2</sup> females.
- (J) The average duration females spent on rejecting the male during light and sham stimulation of Cckar<sup>GFP</sup> and Cckar<sup>ChR2</sup> females.
- (K) The average duration of wiggling during light and sham stimulation of Cckar<sup>GFP</sup> and Cckar<sup>ChR2</sup> females.
- (L) Heatmaps (L1) and PSTHs (L2) showing male SBS aligned to the onset of sham or real light delivered to the paired lactating Cckar<sup>GFP</sup> females. I: intromission; M: mount; A: attempt to mount; No: no mating.
- (M) Same as (L) except that the males were paired with lactating Cckar<sup>ChR2</sup> females.
- (N and O) Male mount success rate (N) and intromission success rate (O) during sham and light trials when the males were paired with Cckar<sup>GFP</sup> or Cckar<sup>ChR2</sup> females.
- (P) Behavioral paradigm and illustration of stimulation protocol. Light was triggered manually when diestrous females were investigating a male juvenile intruder (P15-P25).
- (Q) Raster plots showing female investigation towards a juvenile during sham and light trials from a representative Cckar<sup>ChR2</sup> female.
- (R) PSTHs showing female investigation probability aligned to sham or light onsets of all Cckar<sup>ChR2</sup> females.
- (S) The average duration females spent on investigating the juvenile in sham and light trials.

Data are mean  $\pm$  s.e.m. (H2, I2, L2, M2, R) Two-way ANOVA with repeated measures, followed by Sidak's multiple comparisons test. All  $p > 0.05$ . (C-D, J-K, N) Two-way ANOVA with Sidak's multiple comparisons test. (S) Two-tailed paired t test. \* $p < 0.05$ ; \*\* $p < 0.01$ ; \*\*\* $p < 0.001$ .

n = number of animals. GFP: n=6 (C-D), n=6 (H-O); ChR2: n=9 (C-D), n=5 (H-O). n=7 (R-S).

## Figure S12

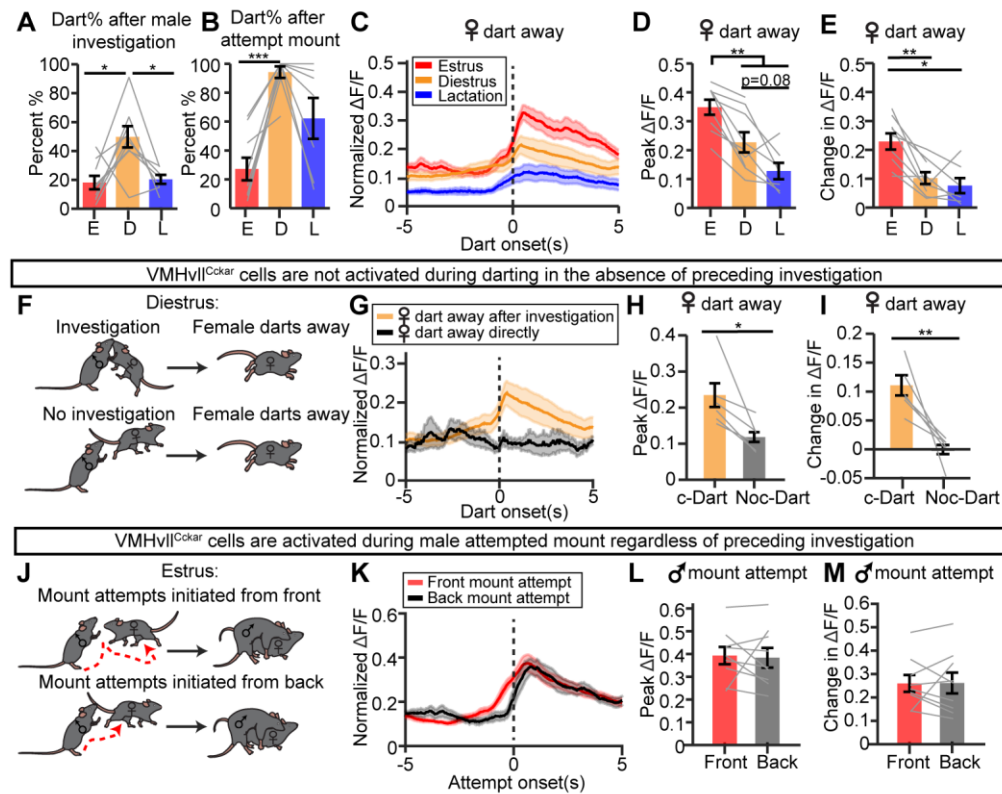

### Figure S12. Additional details regarding responses of female VMHvII<sup>Cckar</sup> cells during male-female interaction. Related to Figure 6

(A-B) The percentage of male investigation trials (A) and attempt mounting trials (B) that are followed by female darting away from the male when the female is under different reproductive state. E: estrus; D: diestrus; L: lactation.

(C) PETHs of normalized  $\Delta F/F$  aligned to the onset of female darting.

(D) Quantification of the peak  $\Delta F/F$  during female darting.

(E) The difference between peak  $\Delta F/F$  and baseline  $\Delta F/F$  preceding darting (-3 and -1 s before darting onset).

(F) Schematics illustrating darting events preceded by male-female investigation (top) or not (bottom).

(G) PETHs of normalized  $\Delta F/F$  aligned to the onset of female darting preceded by male investigation (orange) or not (black).

(H) Peak  $\Delta F/F$  during female darting. c-Dart: Dart following contact. Noc-Dart: dart with no contact.

(I) Difference between peak  $\Delta F/F$  and the mean  $\Delta F/F$  between -3 and -1 s preceding darting.

(J) Schematic illustration of male attempts to mount from front following investigation (top) and male attempts to mount from back without investigation (bottom). Dashed red lines indicate the movement trajectory of the male under these two mounting scenarios.

(K) PETHs of normalized  $\Delta F/F$  aligned to the onset of male front mounting attempts (red) and back mounting attempts (black).

(L) Peak  $\Delta F/F$  during male front and back mounting attempts.

(M) The difference between peak  $\Delta F/F$  and baseline  $\Delta F/F$  preceding attempted mount (-3 and -1 s before the attempt onset).

Data are mean  $\pm$  s.e.m. (A, B, D, E) One-way ANOVA with repeated measures, followed by Tukey's multiple comparisons test. (H, I, L, M) Two-tailed paired t test. \* $p < 0.05$ ; \*\* $p < 0.01$ ; \*\*\* $p < 0.001$ .

n = number of animals. (A-E) n=9 estrous, 9 diestrous and 7 lactating females. (G-I) n=6 diestrous females. (K-M) n=9 estrous females.

# Figure S13

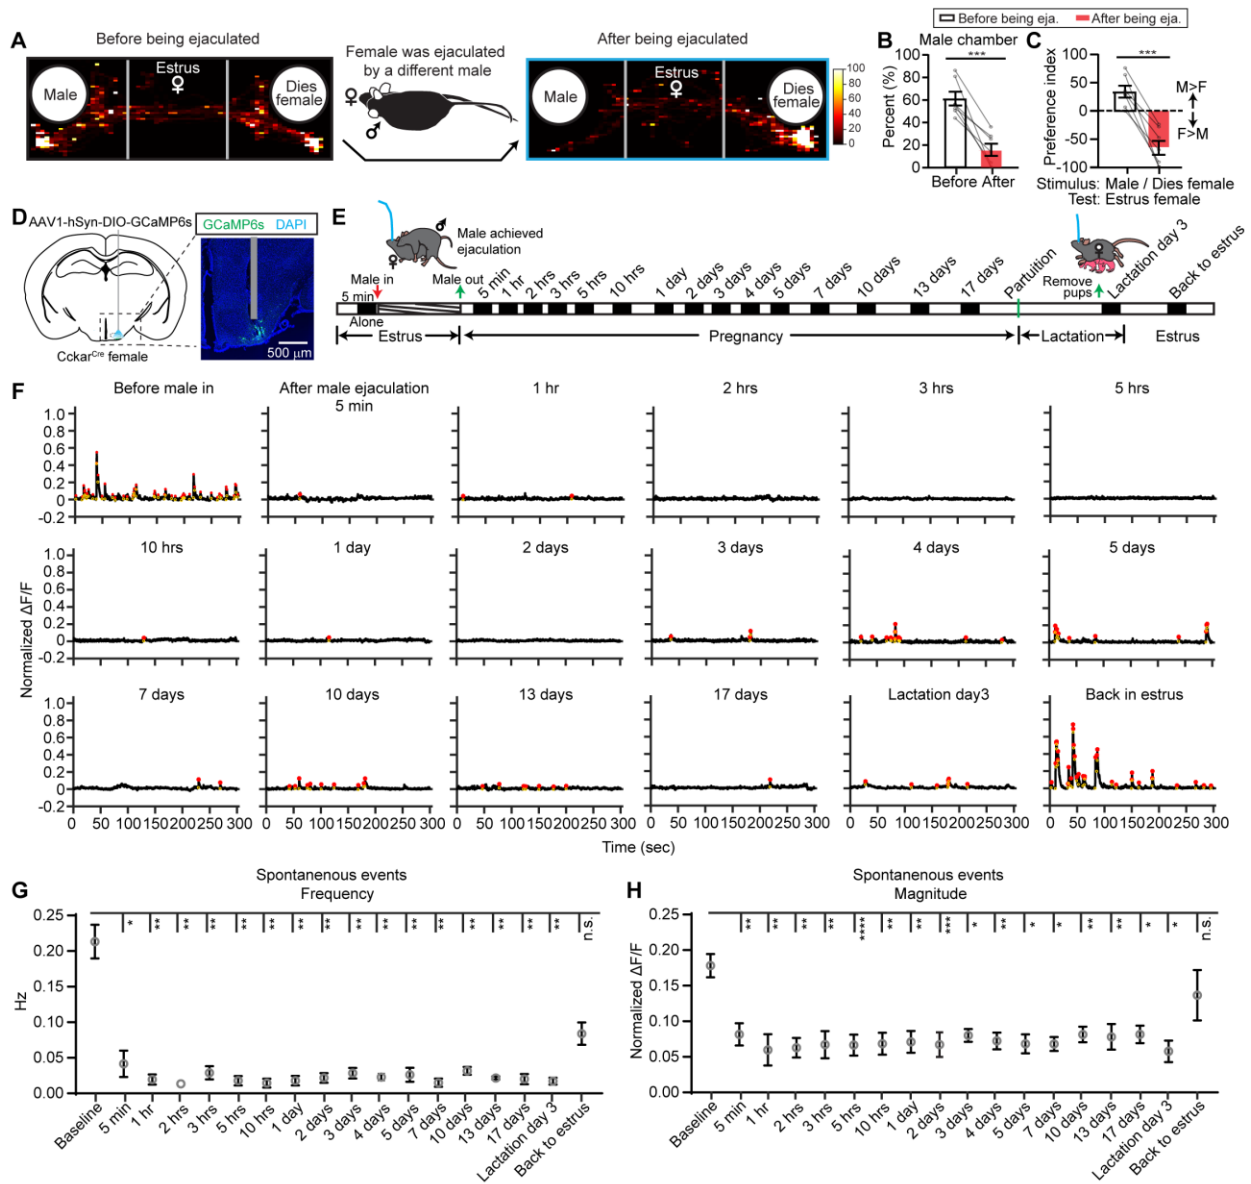

**Figure S13. Changes in female's interest towards males and spontaneous  $\text{Ca}^{2+}$  transients of female VMHvl<sup>Cckar</sup> cells after being ejaculated. Related to Figure 6**

- (A) Heatmap showing the distribution of female's body center location in a social preference test before and after being ejaculated. The test animal is an estrous-receptive female. Stimulus animals are a sexually experienced unfamiliar male (different from the one that copulated with the female) and an unfamiliar diestrous female.
- (B) Percent of time female spent in male's chamber before and after being ejaculated.
- (C) Comparison of preference index (PI) in females before and after being ejaculated. Positive values indicate male preference.

(D) Schematics illustrating fiber photometry recording of VMHvII<sup>Cckar</sup> cells and representative histology image showing the expression of GCaMP6s in VMHvII<sup>Cckar</sup> cells. Shade indicates optic fiber track.

(E) Timeline of the pre- and post-ejaculation recordings. Each recording session lasts 5 minutes.

(F) Representative traces from all recorded time points from one representative animal. Red and yellow dots indicate peaks and troughs of identified transients.

(G-H) Frequency (G) and magnitude (H) of spontaneous Ca<sup>2+</sup> events before and after male ejaculation.

Data are mean ± s.e.m. (B-C) Two-tailed paired t test. (G-H) RM One-way ANOVA, followed by Dunnett's multiple comparisons test. \* $p < 0.05$ ; \*\* $p < 0.01$ ; \*\*\* $p < 0.001$ .

n = number of animals. n=7 (B-C), n= 6 (G-H) females.

## Figure S14

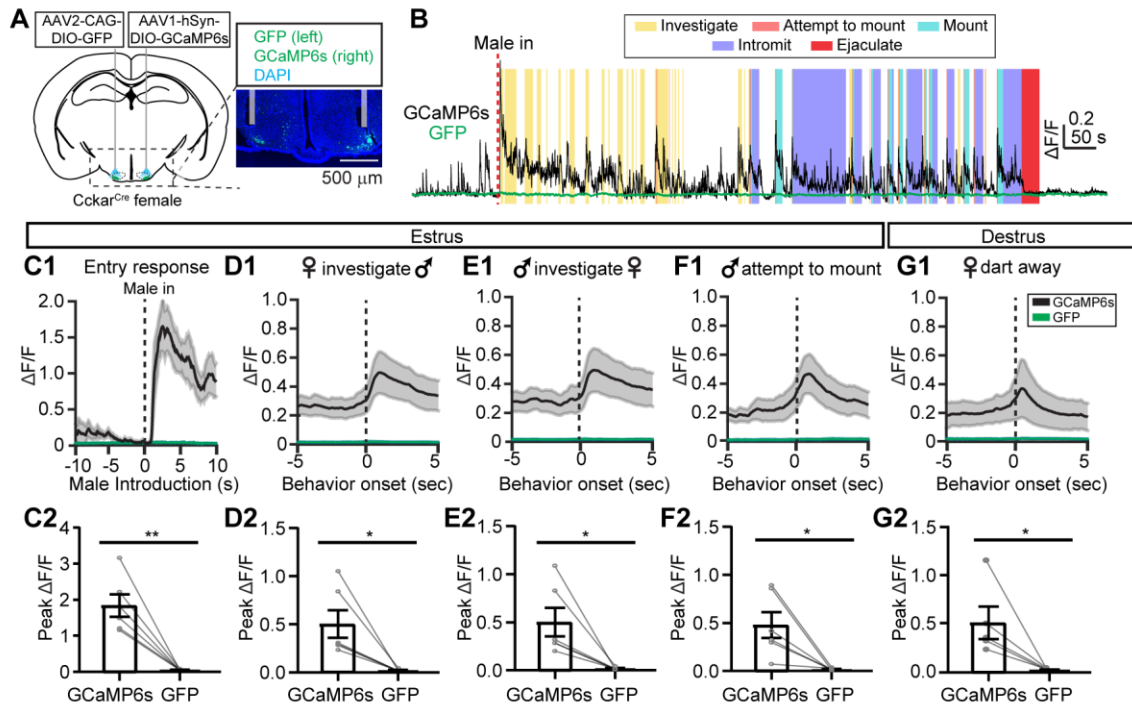

**Figure S14. GFP expressing VMHvl<sup>Cckar</sup> cells show no change in fluorescence during female sexual behaviors. Related to Figure 6**

(A) Viral strategy and a representative image showing GFP and GCaMP6s expression and fiber tracks.

(B) Representative  $\Delta F/F$  GFP (green) and GCaMP6s (black) traces during copulation with a male. Colored shades mark behavioral episodes.

(C1-G1) PETHs of GFP and GCaMP6s signals aligned to the onset of various behaviors from all recording animals.

(C2-G2) Peak signal of GFP and GCaMP6s PETHs aligned to the onsets of male introduction (C2), female investigating male (D2), male investigating female (E2), male attempting to mount (F2), and female darting away (G2).

Data are mean  $\pm$  s.e.m. (C2, F2 and G2), Two-tailed paired t test. (D2 and E2), Two-tailed Wilcoxon matched-pairs signed rank test. \* $p < 0.05$ ; \*\* $p < 0.01$ ;

n = number of animals. n=6 (C2-F2) and n= 5 (G2) females.

## Figure S15

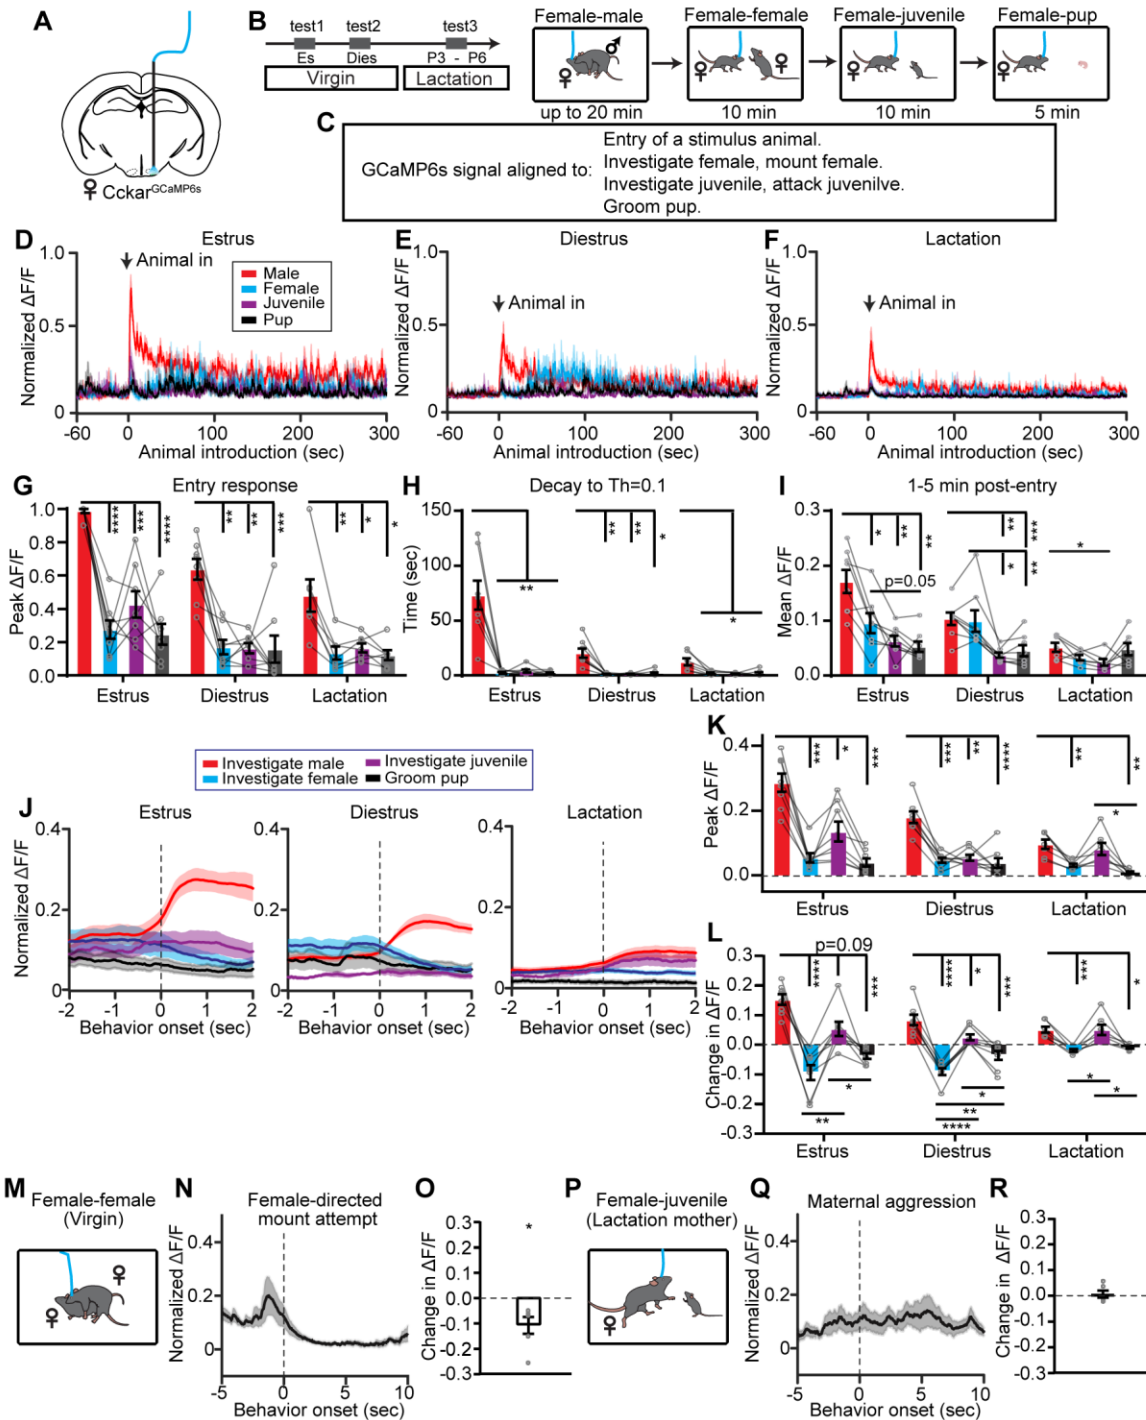

**Figure S15. Responses of VMHvl<sup>Cckar</sup> cells during interactions with females, juveniles and pups. Related to Figure 6**

(A) Schematics illustration of fiber photometry recording of female VMHvl<sup>Cckar</sup> cells.

(B) Schematic illustration of the recording protocol.

(C) Main parameters analyzed in the figure.

(D-F) PETHs of normalized  $\Delta F/F$  aligned to the introduction of various social stimuli. Each trace is the averaged PETHs of all recorded females in estrus (D), diestrus (E) and lactation (F).

(G) Peak  $\Delta F/F$  within the first 60 s after male entry.

(H) Upon stimulus animal introduction, the decay time for the normalized  $\Delta F/F$  to reach 0.1 after peaking

(I) Mean  $\Delta F/F$  from 1-5 minutes after stimulus animal introduction.

(J) PETHs of normalized  $\Delta F/F$  aligned to the onset of investigating male, investigating female, investigating juvenile and grooming pup. Each trace is the average of all recorded females in estrus (left), diestrus (middle) and lactation (right).

(K) Peak  $\Delta F/F$  during various behaviors under different reproductive states.

(L) Difference between the peak  $\Delta F/F$  during the behavior and the mean  $\Delta F/F$  between -3 and -1 sec before the behavior onset.

(M) Cartoon showing female-female mounting.

(N) Average PETH of normalized  $\Delta F/F$  aligned to the onset of female-directed mounting attempt.

(O) Change in  $\Delta F/F$  during female mounting attempt from the baseline  $\Delta F/F$  (-3 and -1 sec) preceding the onset of mount attempt.

(P) Carton showing a lactating female attacking a juvenile intruder.

(Q) Average PETH of normalized  $\Delta F/F$  aligned to the onset of attacking juvenile.

(R) Difference between the peak  $\Delta F/F$  during attacking juvenile and the mean baseline  $\Delta F/F$  (-3 and -1 sec) preceding the attack onset.

Data are mean  $\pm$  s.e.m. (G-I, K-L) Two-way ANOVA with Tukey's multiple comparisons test. (O) One sample Wilcoxon signed-rank test, with hypothetical value as 0. (R) One sample t test, with hypothetical value as 0. \* $p < 0.05$ ; \*\* $p < 0.01$ ; \*\*\* $p < 0.001$ .

n = number of animals. (D-L): n=8 estrous, 8 diestrous and 7 lactating females. (O): n=6 virgin females. (R): n = 6 lactating females.



## Figure S16

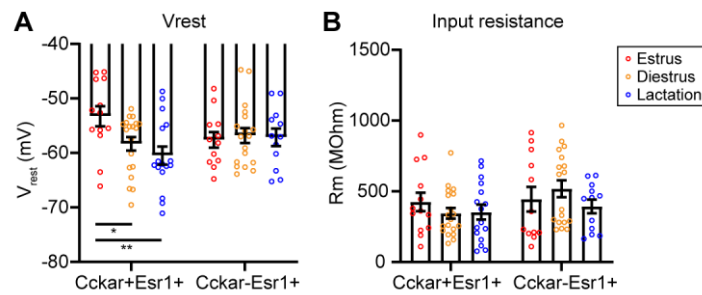

### Figure S16. VMHvII<sup>Cckar</sup> cells show more depolarized resting membrane potential during estrus. Related to Figure 8

(A-B) The resting membrane potential (A) and input resistance (B) of VMHvII<sup>Cckar+Esr1+</sup> and VMHvII<sup>Cckar-Esr1+</sup> cells recorded from females under different reproductive states.

Data are mean  $\pm$  s.e.m. (A-B) Two way ANOVA followed by Tukey's multiple comparisons test. \* $p < 0.05$ ; \*\* $p < 0.01$ .

N=13, 19, 16 VMHvII<sup>Cckar+Esr1+</sup> cells and 12, 18, 12 VMHvII<sup>Cckar-Esr1+</sup> cells from 3 females of each reproductive state. Cells with high spontaneous firing rate were excluded from these analyses.

**Figure S17**

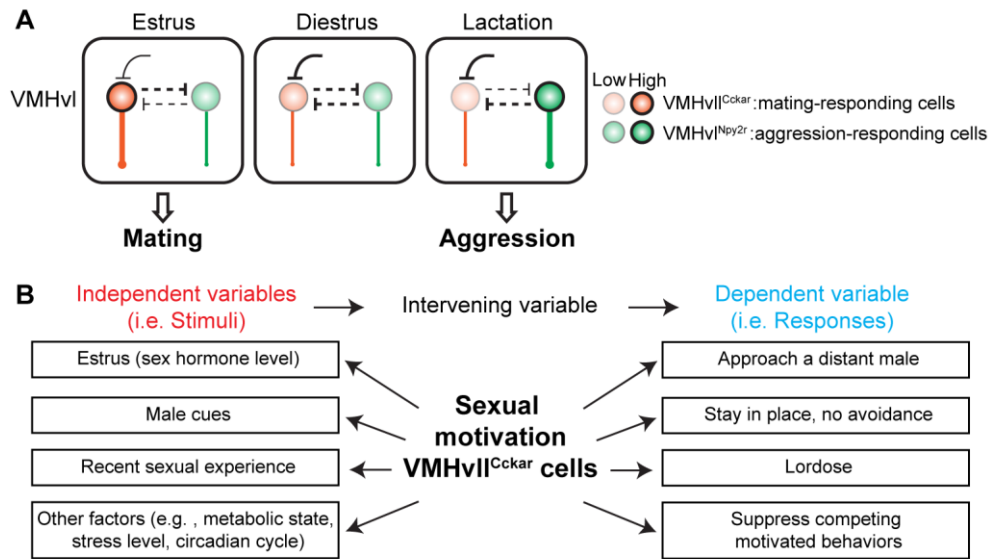

**Figure S17. Working model and VMHvl<sup>Cckar</sup> cells as the intervening variable in the reproduction circuit. Related to Figures 1-8**

(A) A model showing our current knowledge regarding the neural mechanisms underlying behavior change across reproductive states. During estrus, VMHvl<sup>Cckar</sup> cells receive lower inhibitory inputs, increase excitability and axonal arborization to increase the cell output in response to male cues and facilitate female sexual behaviors. In lactating females, VMHvl<sup>Cckar</sup> cells become less responsive due to changes at input, output and cellular levels while responses of VMHvl<sup>Npy2r</sup> cells increase to facilitate aggression.

(B) We propose VMHvl<sup>Cckar</sup> cells as the physical embodiment of sexual motivation, an intervening variable linking different stimuli (independent variables) and many different behavior responses (dependent variables). The figure follows the format of Figure 1 in (Andermann and Lowell, 2017) that describes hunger and AGRP cells as an intervening variable for controlling feeding.
